# Supplementary material
Source: HighWire-hosted journal article supplement (http://molpharm.aspetjournals.org/highwire/filestream/81872/field_highwire_adjunct_files/0/Supplemental_110908.pdf)

## Inhibition of CD45 phosphatase activity induces cell cycle arrest and apoptosis of CD45<sup>+</sup> lymphoid tumors *ex vivo* and *in vivo*

Michael Perron, and H. Uri Saragovi

### Running title

Validation of CD45 PTPase enzyme inhibition for cancer therapy

### SUPPLEMENTAL FIGURES

**FIGURE S1.** Two other therapeutic experiments were carried out as in Figure 3B, with the paradigm slightly modified (top, 300,000 cells inoculated and treatment started at day 3, n= 5 mice/group; and bottom 200,000 cells inoculated and treatment started at day 6, n=7 mice/group). Average tumor volume  $\pm$  sd are shown.

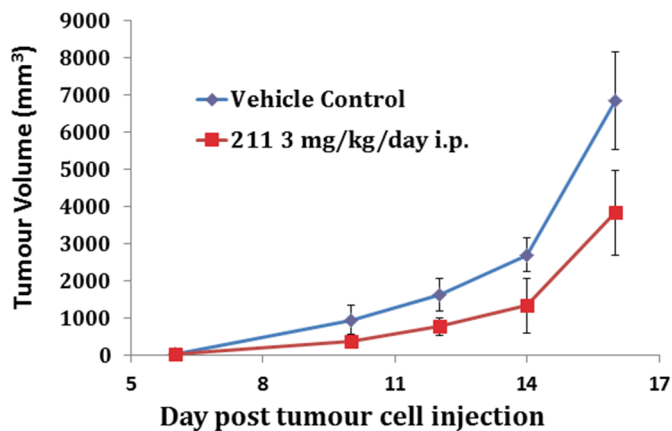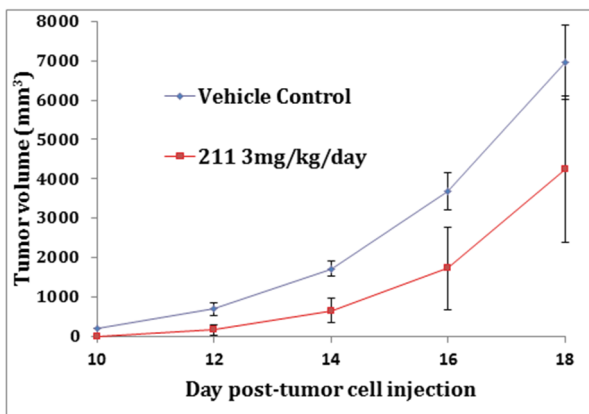

**FIGURE S2**

EL4 cells express high levels of a tumor marker ganglioside GD2. Cryosections of tissue from tumor-bearing mice (treated with vehicle control or with **211**) were immunostained for GD2 expression, with pictures taken using epifluorescent microscopy.

**211-treated**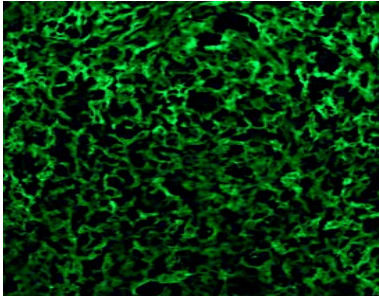**vehicle**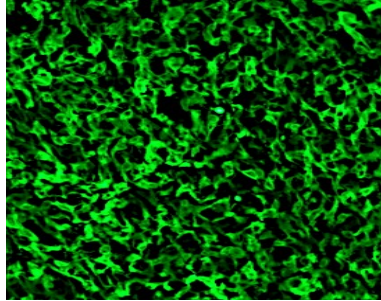

Supplement: Supplemental_110908.pdf [file Supplemental_110908.pdf]
